# Supplementary material
Source: PubMed Central journal article supplement (PMC3677165)

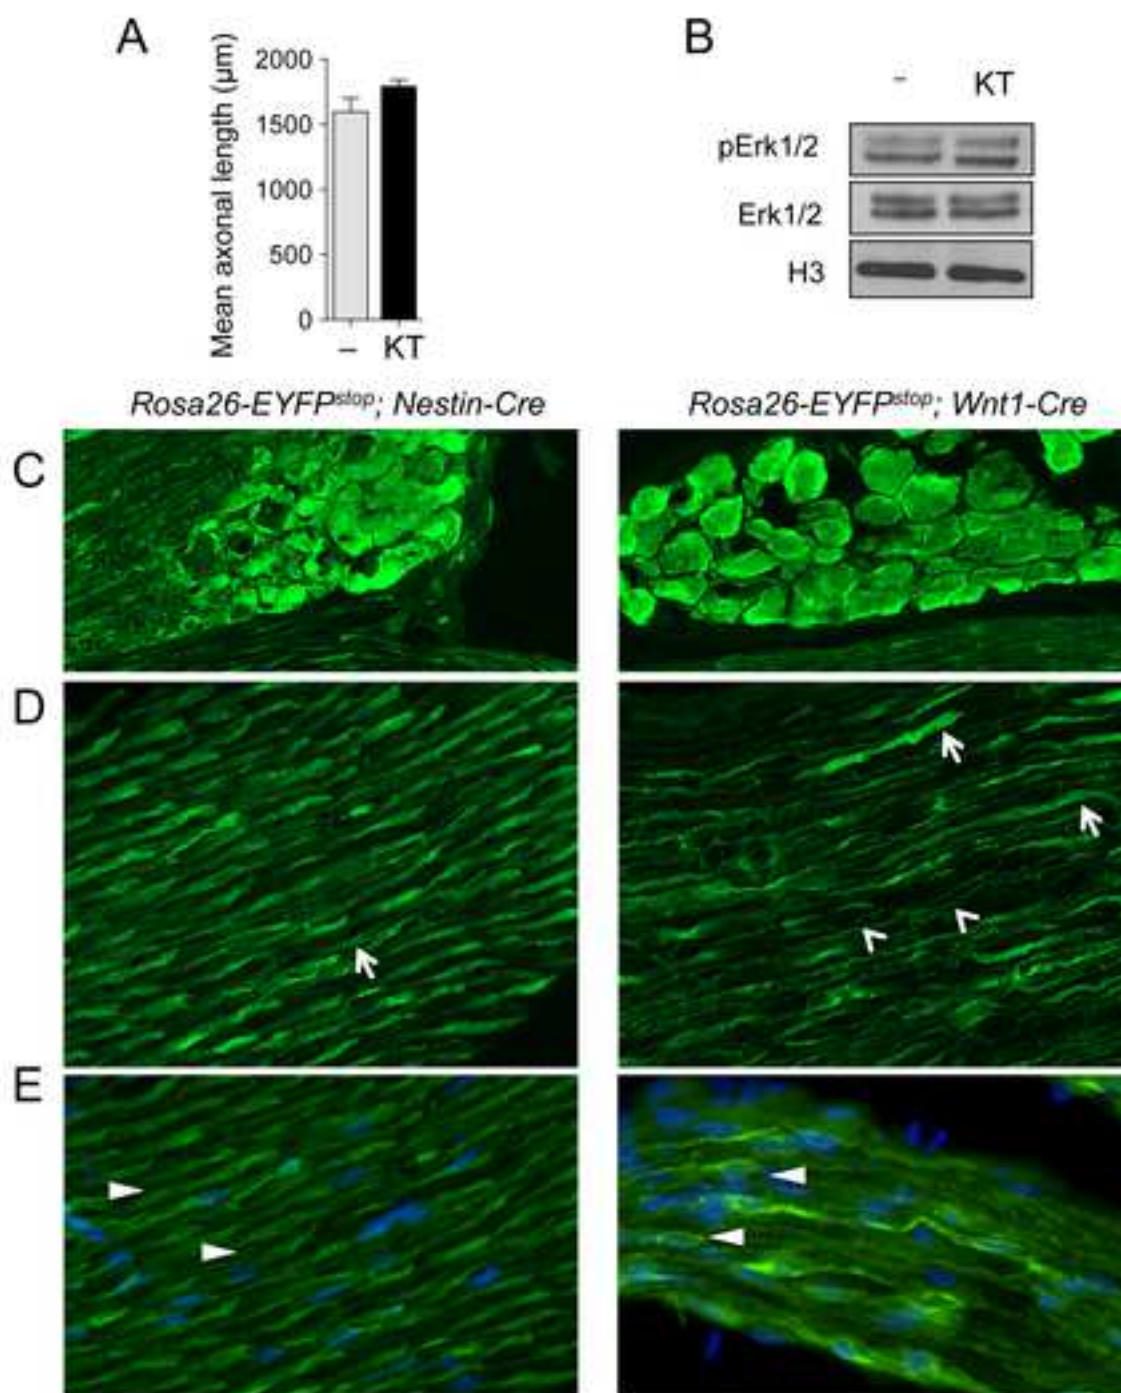

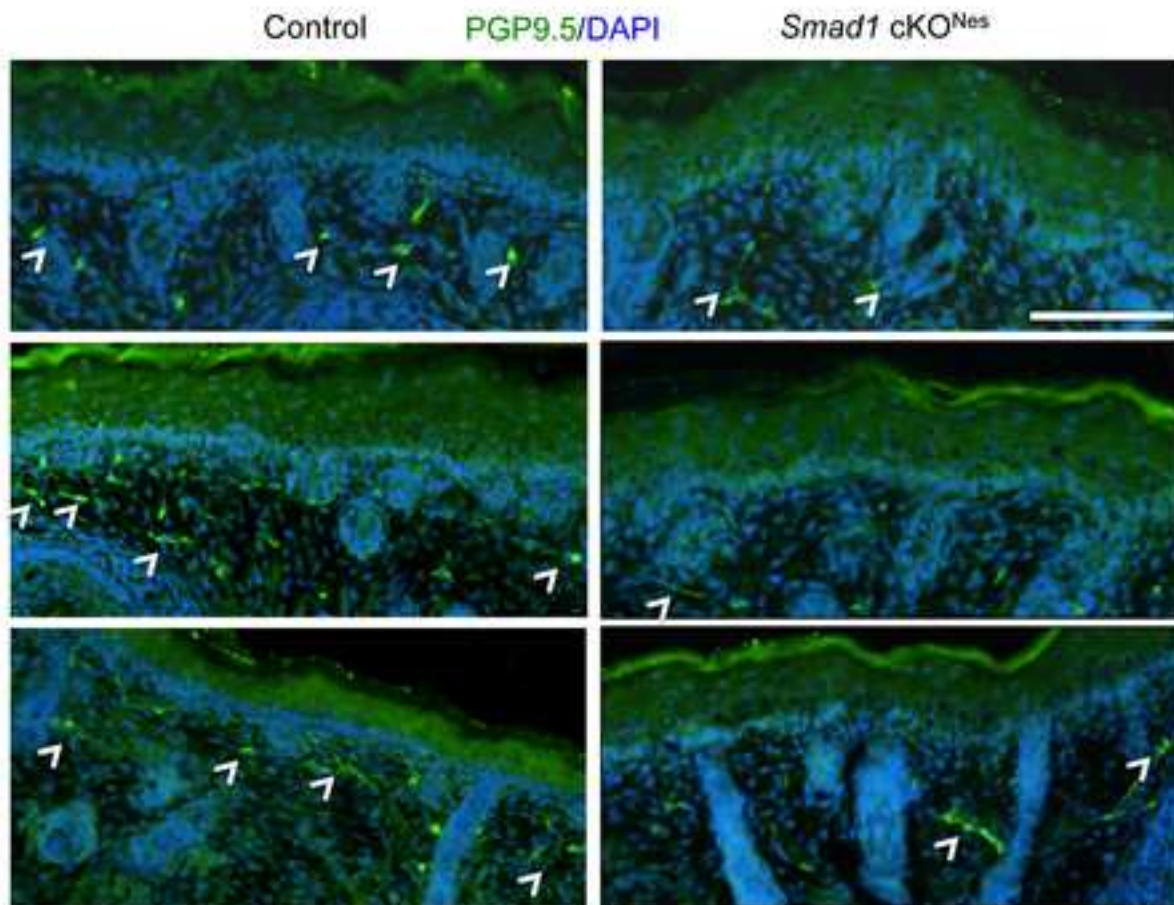

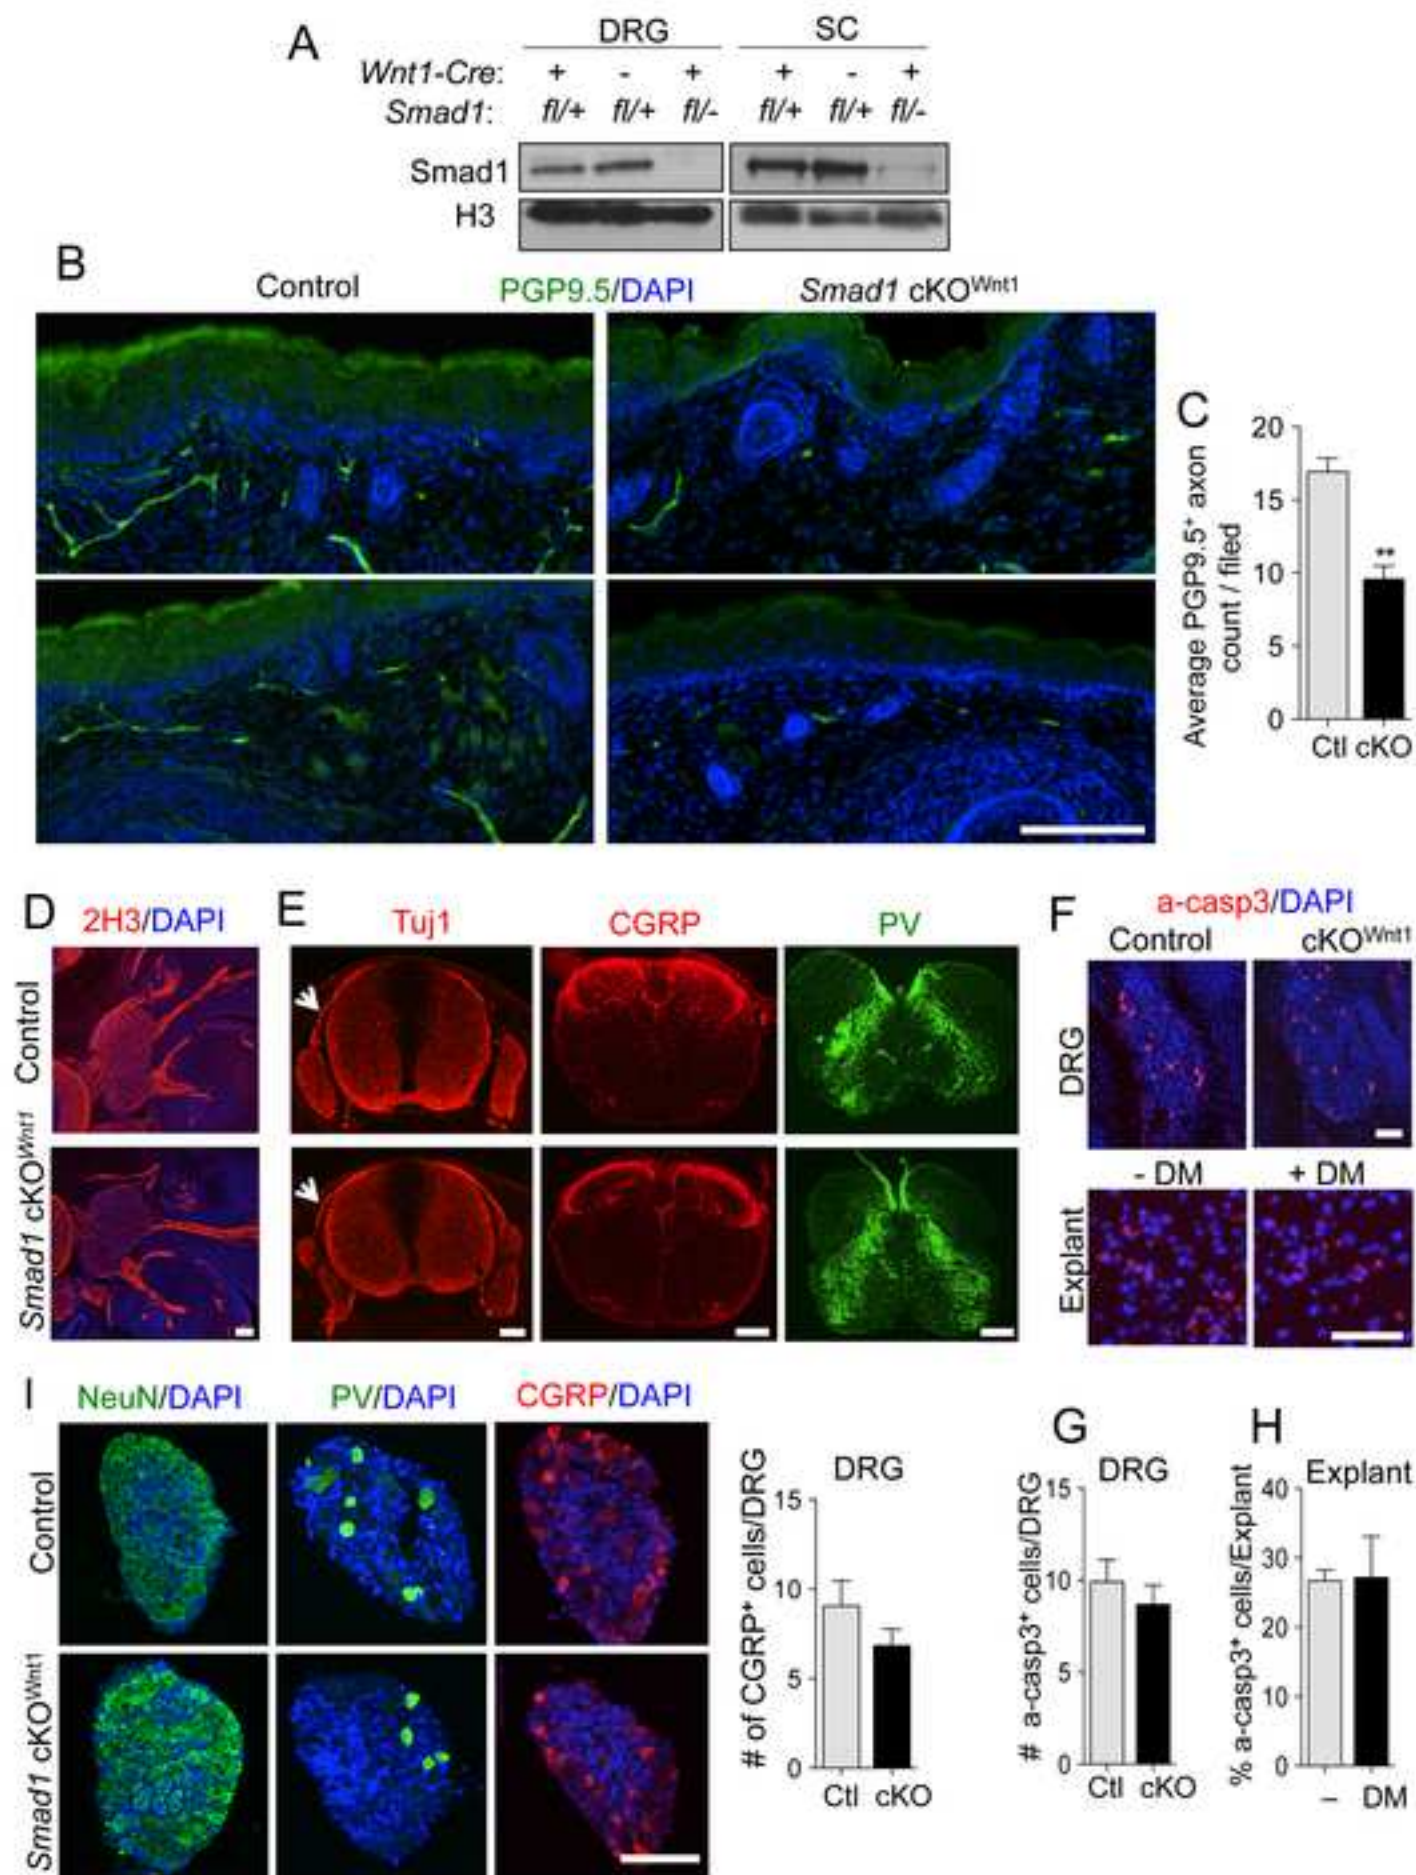

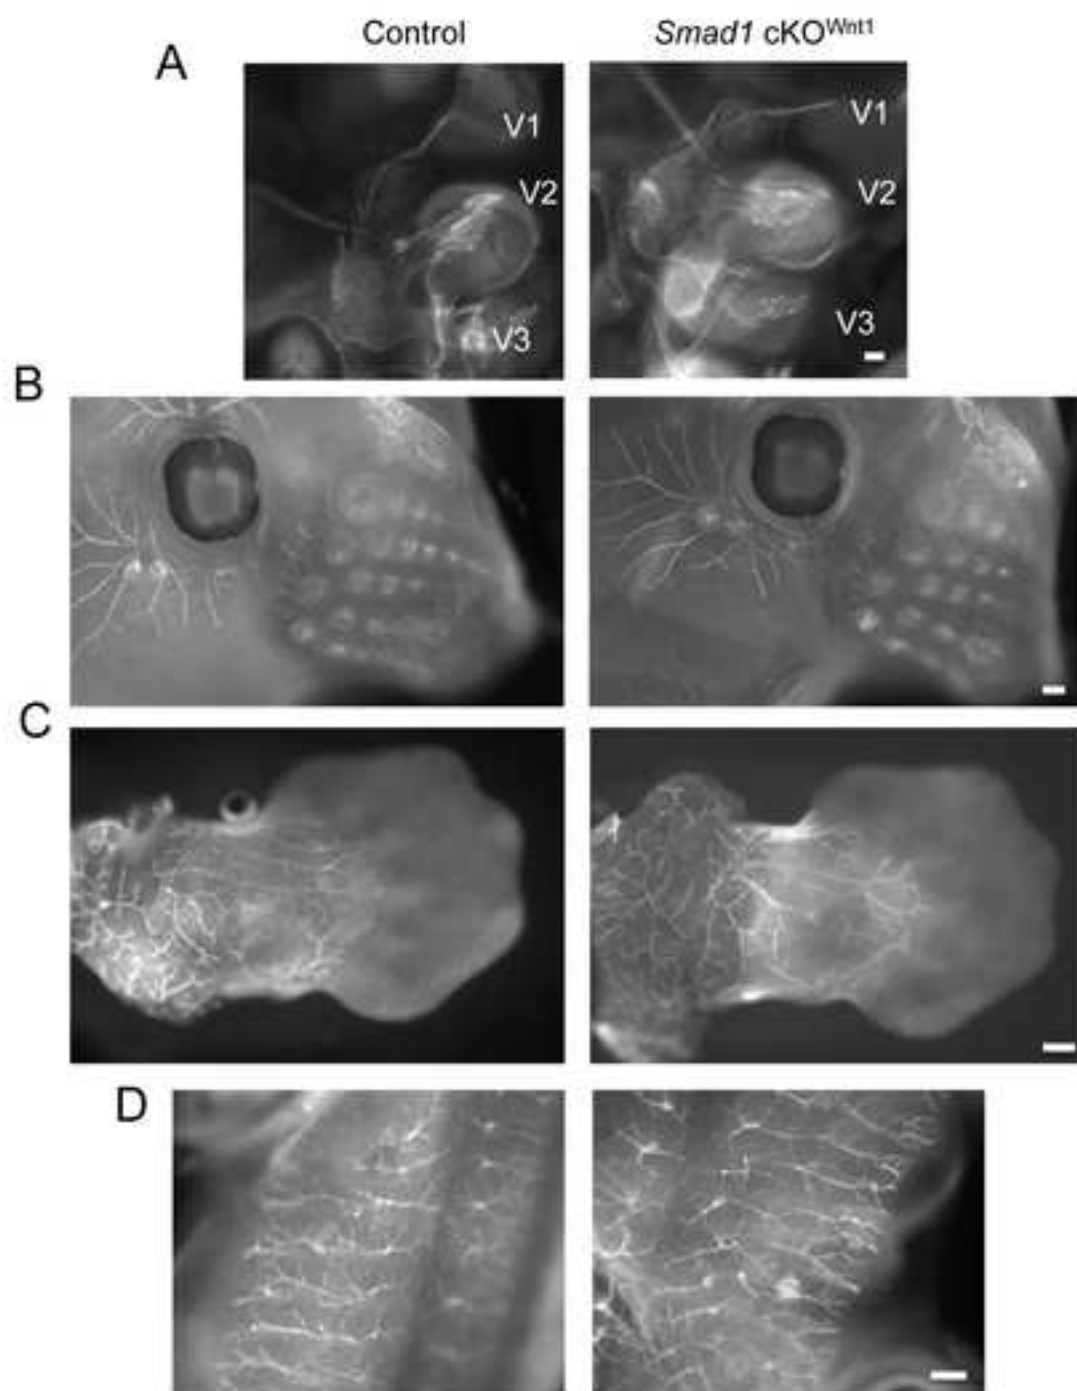

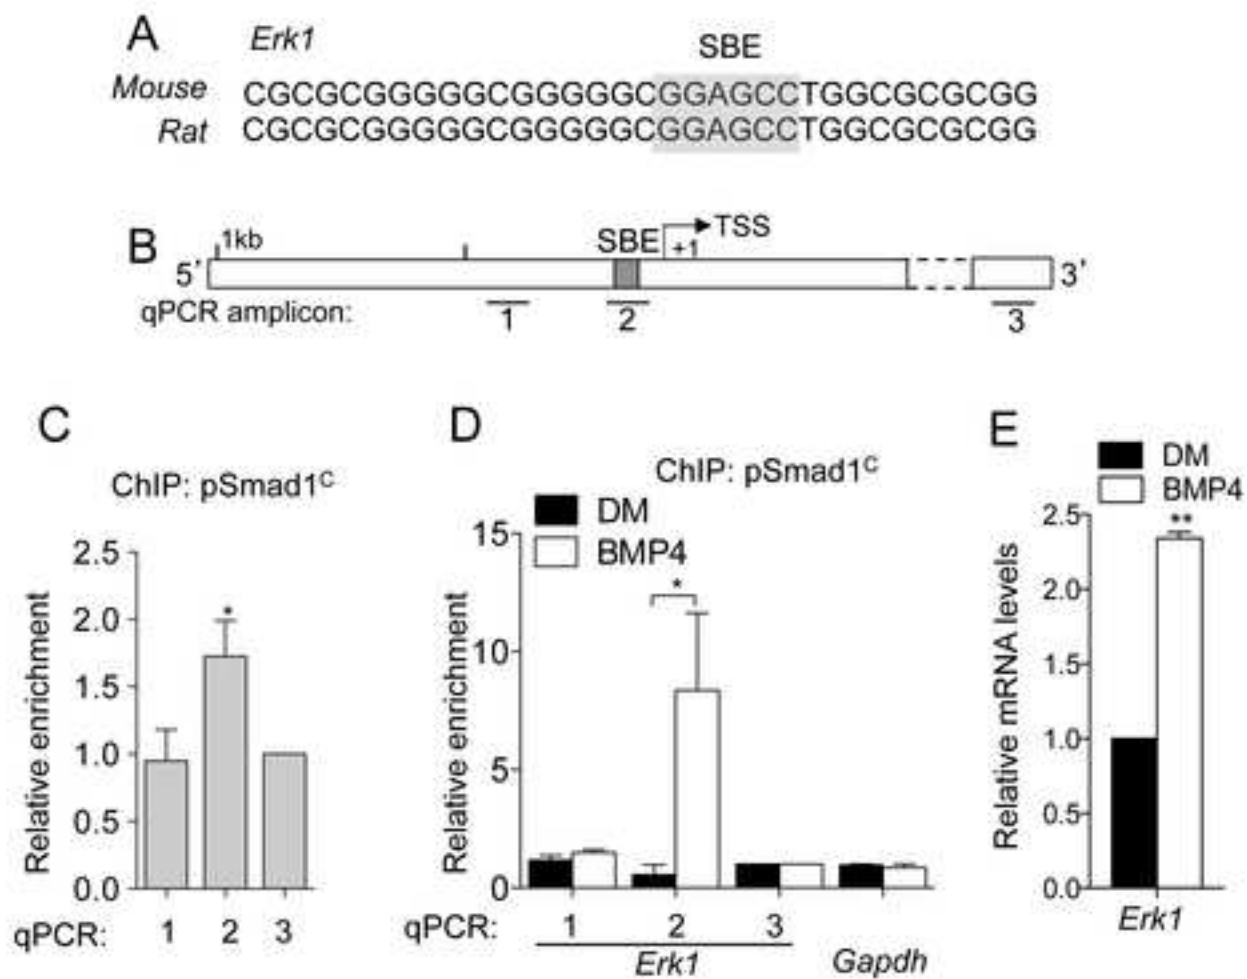

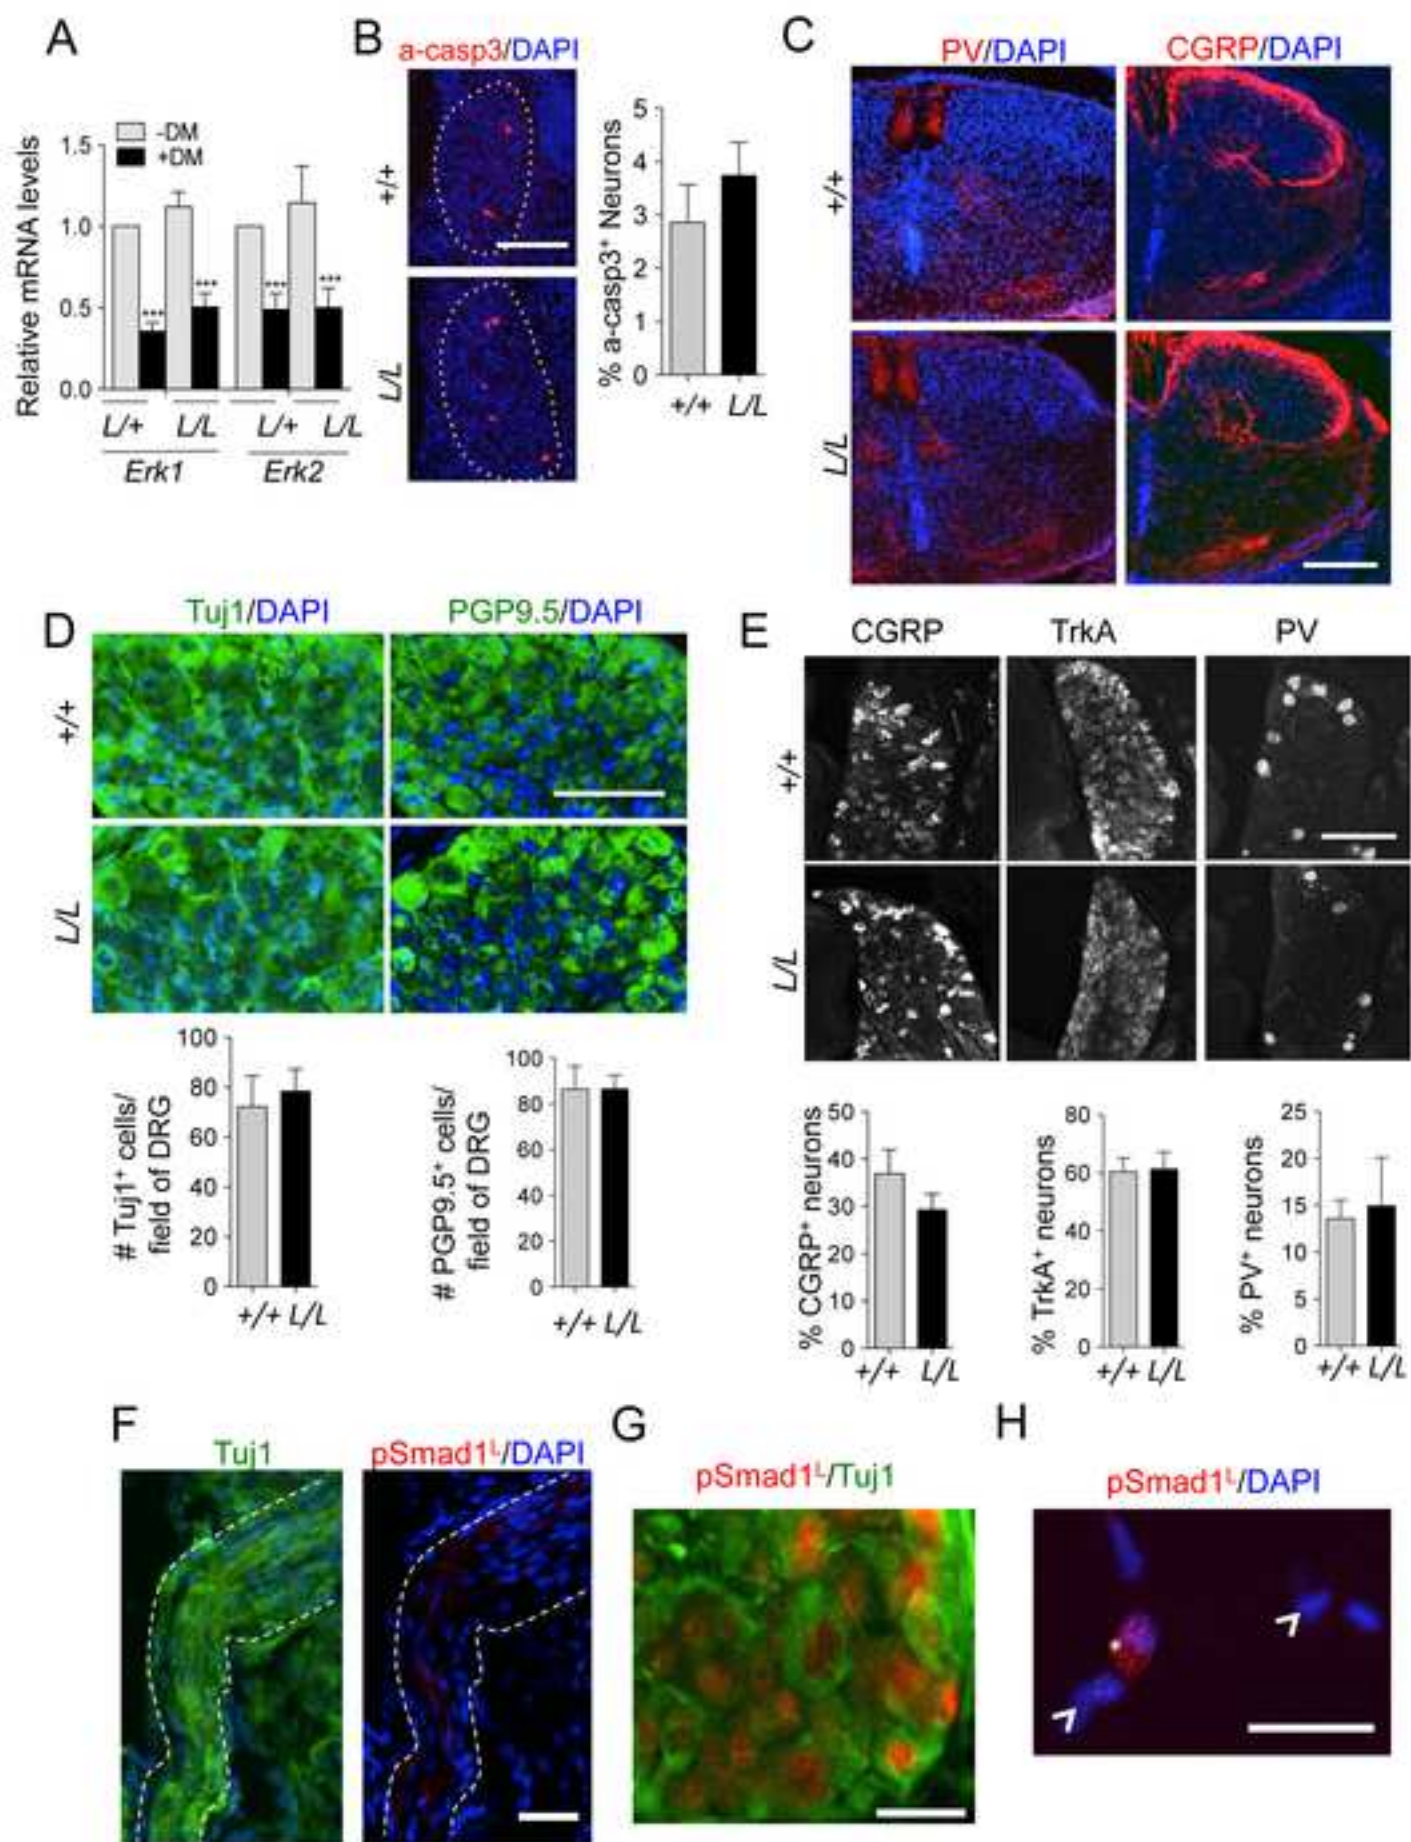

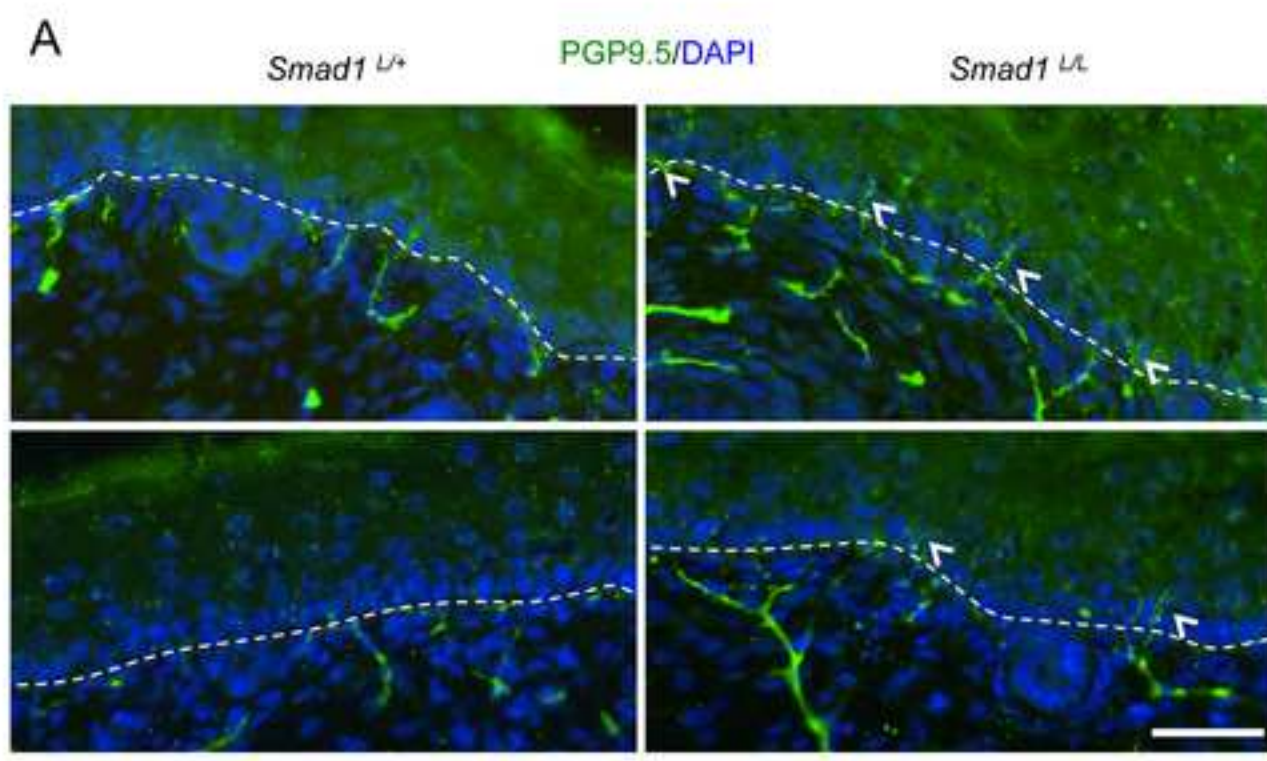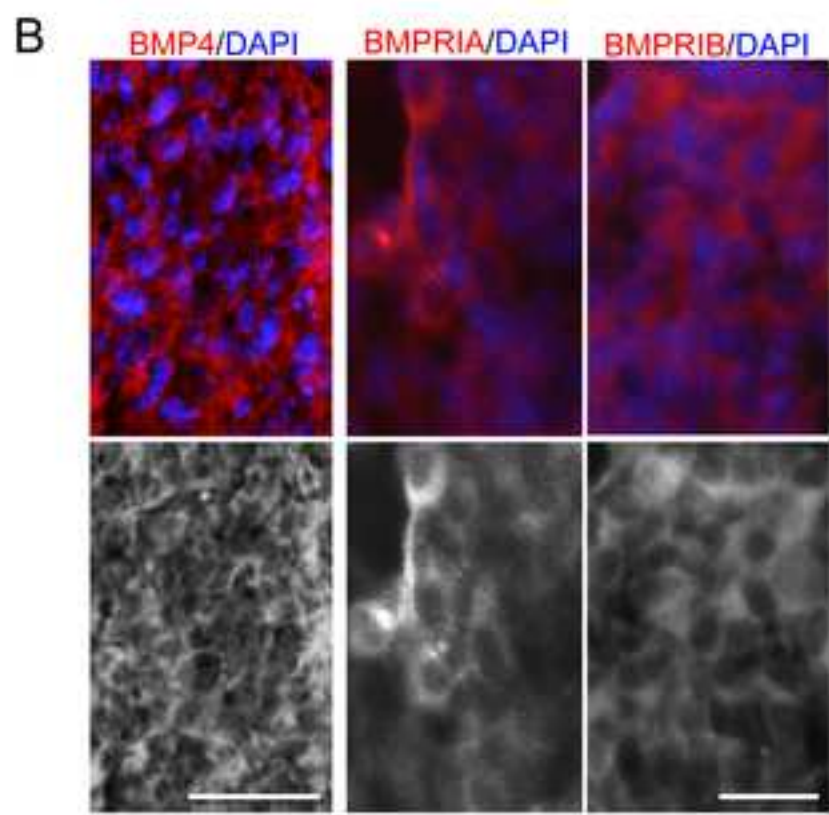

Supplement: NIHMS470713-supplement-02.pdf [file NIHMS470713-supplement-02.pdf]
